# Supplementary material for: Functional Studies of Tyrosine Hydroxylase Missense Variants Reveal Distinct Patterns of Molecular Defects in Dopa-Responsive Dystonia
Source: PubMed Central journal article supplement — Hum Mutat. 2014 Jun 3;35(7):880–90. doi: 10.1002/humu.22565 (PMC4312968; doi:10.1002/humu.22565), 2014-06-03
Supplement: humu0035-0880-sd1.pdf [file humu0035-0880-sd1.pdf]

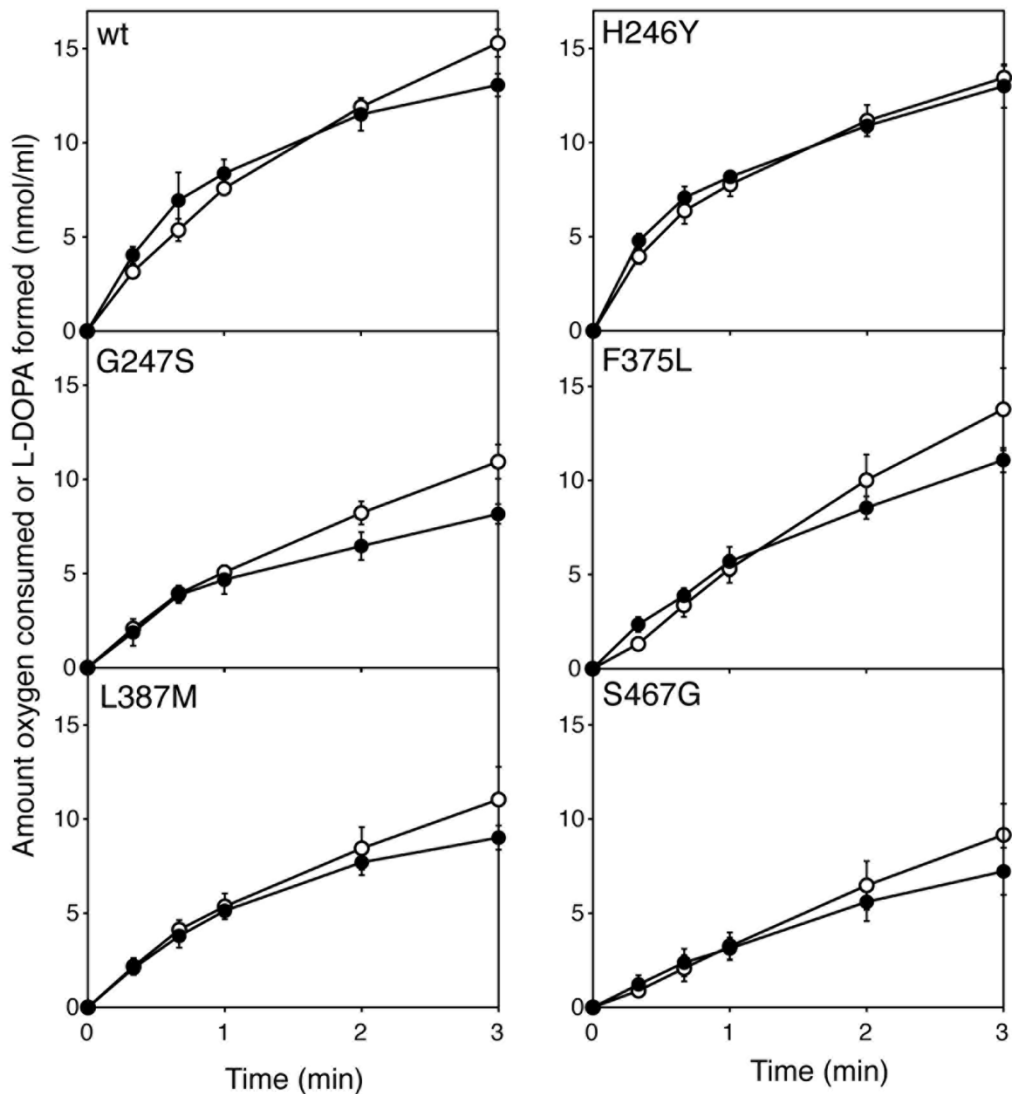

**Supp. Figure S1.** Oxygraphy of wt-TH and THD mutants. Oxygen consumption ( $\circ$ ) and L-DOPA formation (measured by HPLC) ( $\bullet$ ) by wt-TH (A), TH p.His246Tyr (B), TH p.Gly247Ser (C), TH p.Phe375Leu (D), TH p.Leu387Met (E), and TH p.Ser467Gly (F). ( $n = 3 \pm$  SD for all experiments).

**Supp. Table S1. Primers used for pcr-based mutagenesis using the QuikChange mutagenesis (Stratagene, La Jolla, CA, USA)**

|             |                                                                                                                  |
|-------------|------------------------------------------------------------------------------------------------------------------|
| p.Cys207Tyr | Forward 5'-TGTCAGAGCTGGACAAG <b>TAT</b> CATCACCTGGTCAC<br>Reverse 5'-GTGACCAGGTGATG <b>ATA</b> CTTGTCCAGCTCTGACA |
| p.Asp227Gly | Forward 5'-CGGGCTTCTCG <b>GGC</b> CAGGTGTACCG<br>Reverse 5'-CGGTACACCTG <b>GCC</b> CGAGAAGCCCG                   |
| p.Ala241Thr | Forward 5'-GCTGATTGCTGAGATC <b>ACC</b> TTCCAGTACAGGCA<br>Reverse 5'-TGCCTGTACTGGAA <b>GGT</b> GATCTCAGCAATCAGC   |
| p.His246Tyr | Forward 5'-CCTTCCAGTACAGG <b>TAC</b> GGCGACCCGATT<br>Reverse 5'-AATCGGGTCGCC <b>GTA</b> CCTGTACTGGAAGG           |
| p.Gly247Ser | Forward 5'-CCAGTACAGGCAC <b>AGC</b> GACCCGATTCC<br>Reverse 5'-GGAATCGGGTC <b>GCT</b> GTGCCTGTACTGG               |
| p.Glu259Gly | Forward 5'-TACACCGCCGAG <b>GGG</b> ATTGCCACCTGG<br>Reverse 5'-CCAGGTGGCAAT <b>CCC</b> CTCGGCGGTGTA               |
| p.Pro301Ala | Forward 5'-ACCGGAAGACAATATC <b>GCC</b> CAGCTGGAGG<br>Reverse 5'-CCTCCAGCTG <b>GGC</b> GATATTGTCTTCCCGT           |
| p.Phe309Ser | Forward 5'-GGACGTCTCCCGCT <b>TCC</b> CTGAAGGAGCG<br>Reverse 5'-CGCTCCTCAG <b>GGA</b> GCGGGAGACGTCC               |
| p.Arg319Pro | Forward 5'-CTTCCAGCTG <b>CCG</b> CCTGTGGCCG<br>Reverse 5'-CGGCCACA <b>GGC</b> GGCAGCTGGAAG                       |
| p.Arg328Trp | Forward 5'-CTGCTGTCCGCCT <b>TGG</b> GACTTCCTGG<br>Reverse 5'-CCAGGAAGTC <b>CCA</b> GGCAGGACAGCAG                 |
| p.Cys359Phe | Forward 5'-CCTGAGCCGGACT <b>TTCT</b> GCCACGAGCTG<br>Reverse 5'-CAGCTCGTGGCA <b>GAA</b> GTCCGGCTCAGG              |
| p.Phe375Leu | Forward 5'-GGCCGACCGCACCT <b>TG</b> GGCGCAGTT<br>Reverse 5'-AACTGCGC <b>CAA</b> GGTGC GGTCGGCC                   |
| p.Ala376Val | Forward 5'-GACCGCACCTTC <b>GTG</b> CAGTTCTCGCAG<br>Reverse 5'-CTGCGAGAACTG <b>CAC</b> GAAGGTGCGGTC               |
| p.Leu387Met | Forward 5'-GCCTGGCGTCC <b>ATG</b> GGGGCCTCG<br>Reverse 5'-CGAGGCCCC <b>CAT</b> GGACGCCAGGC                       |

|             |                                                                                                                    |
|-------------|--------------------------------------------------------------------------------------------------------------------|
| p.Ile394Thr | Forward 5'-GGGCCTCGGATGAGGAA <b>ACT</b> GAGAAGCTGTCC<br>Reverse 5'-GGACAGCTTCTC <b>AGT</b> TTTCCTCATCCGAGGCC       |
| p.Thr399Met | Forward 5'-AAATTGAGAAGCTGTCC <b>ATG</b> CTGTACTGGTTCACG<br>Reverse 5'-CGTGAACCAGTACAG <b>CAT</b> GGACAGCTTCTCAATTT |
| p.Gly414Arg | Forward 5'-CTGTGTAAGCAGAAC <b>AGG</b> GAGGTGAAGGCCT<br>Reverse 5'-AGGCCTTCACCTC <b>CCT</b> GTTCTGCTTACACAG         |
| p.Arg441Pro | Forward 5'-GAGCCTGAGATT <b>CCG</b> GCCTTCGACCC<br>Reverse 5'-GGGTCAAGGC <b>CGG</b> AATCTCAGGCTC                    |
| p.Gln459X   | Forward 5'-ACCAAGACCAGACGTAC <b>TAG</b> TCAGTCTACTTCGTG<br>Reverse 5'-CACGAAGTAGACTGA <b>CTA</b> GTACGTCTGGTCTTGGT |
| p.Ser467Gly | Forward 5'-CTACTTCGTGTCTGAG <b>GGC</b> TTCAAGTACGCCAA<br>Reverse 5'-TTGGCGTCACTGAA <b>GCC</b> CTCAGACACGAAGTAG     |
| p.Pro492Leu | Forward 5'-CGTGAAGTTCGAC <b>CTG</b> TACACGCTGGCCA<br>Reverse 5'-TGGCCAGCGTGTA <b>CAG</b> GTGGAAGTTCACG             |
| p.Asp498Gly | Forward 5'-CGCTGGCCATC <b>GGC</b> GTGCTGGACAG<br>Reverse 5'-CTGTCCAGCAC <b>GCC</b> GATGGCCAGCG                     |
| p.Leu510Gln | Forward 5'-GCGGCGCTCC <b>CAG</b> GAGGGTGTCC<br>Reverse 5'-GGACACCCTC <b>CTG</b> GGAGCGCCGC                         |

Primers were bought from Invitrogen™. Nucleotide numbering uses +1 as the A of the ATG translation initiation codon in the reference sequence, with the initiation codon as codon 1. NCBI Reference Sequence: NM\_199292.2.
